# Supplementary material for: Anti-Infectivity against Herpes Simplex Virus and Selected Microbes and Anti-Inflammatory Activities of Compounds Isolated from Eucalyptus globulus Labill
Source: PubMed Central journal article supplement (PMC6070903; doi:10.3390/v10070360), 2018-07-06
Supplement: viruses-10-00360-s001.pdf [file viruses-10-00360-s001.pdf]

Supplementary Materials:

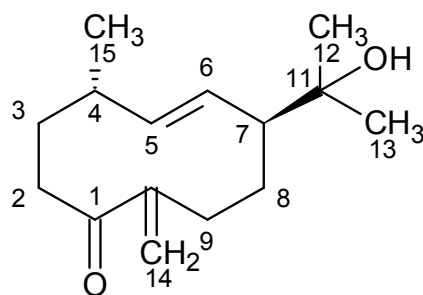

Litseagermacrane

Table S1.  $^1\text{H}$  and  $^{13}\text{C}$  chemical shifts ( $\delta$  in ppm) and HMBC correlations of litseagermacrane (1).

| Position | $\delta\text{C}$ (ppm),<br>type of atom | $\delta\text{H}$ (ppm),<br>mult. (J in Hz) | HMBC correlations      |
|----------|-----------------------------------------|--------------------------------------------|------------------------|
| 1        | 206.0, C                                |                                            |                        |
| 2        | 37.4, CH <sub>2</sub>                   | 2.30, m                                    | 1, 3, 4                |
|          |                                         | 2.83, m                                    | 1, 3, 4                |
| 3        | 36.8, CH <sub>2</sub>                   | 1.80, m                                    | 2, 4                   |
|          |                                         | 2.01, m                                    | 2, 4                   |
| 4        | 40.6, CH                                | 2.08, m                                    | 2, 5, 6                |
| 5        | 142.7, CH                               | 5.00, dd (15.27, 9.33)                     | 4, 6, 7, 15            |
| 6        | 130.1, CH                               | 5.05, dd (15.40, 9.46)                     | 4, 5, 7                |
| 7        | 56.9, CH                                | 1.92, m                                    | 5, 6, 8, 9, 11, 12, 13 |
| 8        | 32.7, CH <sub>2</sub>                   | 1.30, m                                    | 6, 7, 9, 10, 11        |
|          |                                         | 1.35, m                                    | 6, 7, 9, 10, 11        |
| 9        | 28.7, CH <sub>2</sub>                   | 2.25, m                                    | 7, 10, 14              |
|          |                                         | 2.55, t (13.00)                            | 7, 8, 10, 14           |
| 10       | 155.0, C                                |                                            |                        |
| 11       | 71.6, C                                 |                                            |                        |
| 12       | 26.7, CH <sub>3</sub>                   | 1.09, s                                    | 7, 11, 13              |
| 13       | 26.7, CH <sub>3</sub>                   | 1.13, s                                    | 7, 11, 12              |
| 14       | 119.7, CH <sub>2</sub>                  | 5.50, s                                    | 1, 9, 10               |
|          |                                         | 5.64, s                                    | 1, 9, 10               |
| 15       | 20.6, CH <sub>3</sub>                   | 0.97, d (6.00)                             | 3, 4, 5                |

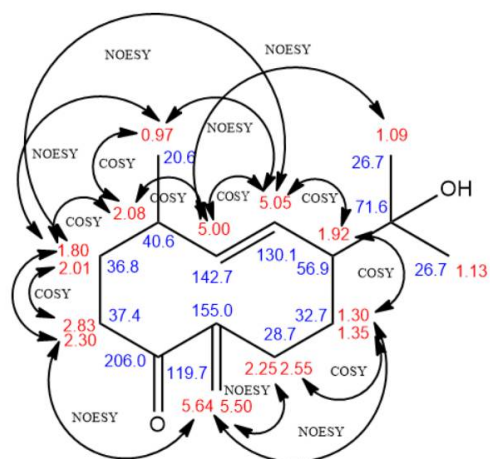

Figure S1. COSY and NOESY scheme of litseagermacrane (1).

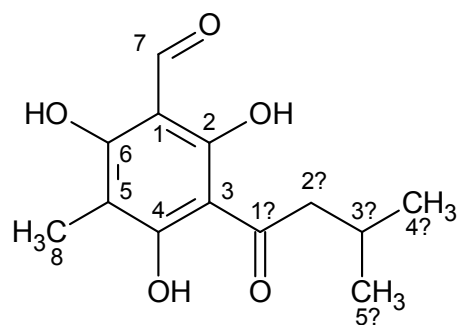

Grandinol

**Table S2.**  $^1\text{H}$  and  $^{13}\text{C}$  chemical shifts ( $\delta$  in ppm) and HMBC correlations of grandinol (2).

| Position | $\delta\text{C}$ (ppm),<br>type of atom | $\delta\text{H}$ (ppm),<br>mult. (J in Hz) | HMBC<br>correlations |
|----------|-----------------------------------------|--------------------------------------------|----------------------|
| 1        | 102.8, C                                |                                            |                      |
| 2        | 167.7, C                                |                                            |                      |
| 3        | 103.9, C                                |                                            |                      |
| 4        | 171.4, C                                |                                            |                      |
| 5        | 100.5, C                                |                                            |                      |
| 6        | 160.9, C                                |                                            |                      |
| 7        | 191.2, CHO                              | 10.12, s                                   | 2                    |
| 8        | 6.16, $\text{CH}_3$                     | 2.05, s                                    | 4, 5, 6              |
| 1'       | 206.6, C                                |                                            |                      |
| 2'       | 52.7, $\text{CH}_2$                     | 3.01, 2H, d (6.55)                         | 1', 3', 4', 5'       |
| 3'       | 24.9, CH                                | 2.27, m                                    | 2', 4', 5'           |
| 4'       | 22.6, $\text{CH}_3$                     | 0.99, d (6.55)                             | 2', 3', 5'           |
| 5'       | 22.6, $\text{CH}_3$                     | 0.99, d (6.55)                             | 2', 3', 4'           |
| 2-OH     |                                         | 14.34, s                                   | 1, 2, 3              |
| 4-OH     |                                         | 15.46, s                                   | 3, 4, 5              |

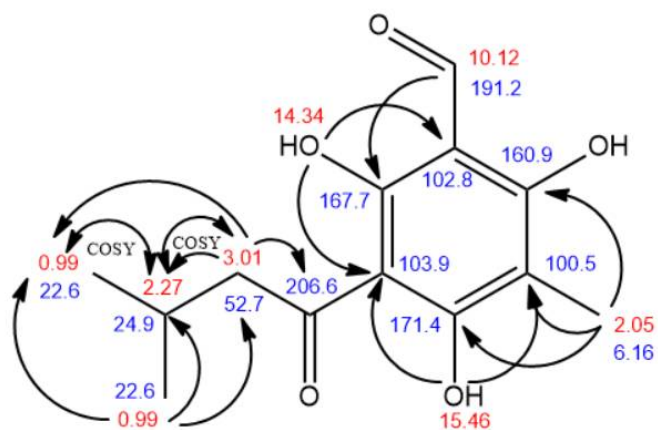

**Figure S2.** HMBC and COSY scheme of grandinol (2)

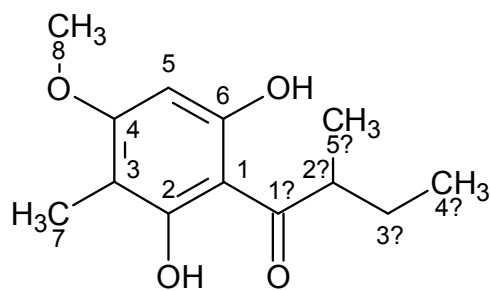

Pulverulentone B

**Table S3.**  $^1\text{H}$  and  $^{13}\text{C}$  chemical shifts ( $\delta$  in ppm) and HMBC correlations of pulverulentone B (3).

| Position | $\delta\text{C}$ (ppm),<br>type of atom | $\delta\text{H}$ (ppm),<br>mult. (J in Hz) | HMBC<br>correlations             |
|----------|-----------------------------------------|--------------------------------------------|----------------------------------|
| 1        | 105.5, C                                |                                            |                                  |
| 2        | 165.0, C                                |                                            |                                  |
| 3        | 102.8, C                                |                                            |                                  |
| 4        | 161.0, C                                |                                            |                                  |
| 5        | 89.7, CH                                | 5.93, s                                    | 1, 3, 4, 6                       |
| 6        | 159.3, C                                |                                            |                                  |
| 7        | 7.04, $\text{CH}_3$                     | 2.05, s                                    | 2, 3, 4                          |
| 8        | 55.2, $\text{OCH}_3$                    | 3.85, s                                    | 4                                |
| 1'       | 210.2, C                                |                                            |                                  |
| 2'       | 46.1, CH                                | 3.63, m                                    | 1', 5'                           |
| 3'       | 27.1, $\text{CH}_2$                     | 1.38, m<br>1.78, m                         | 1', 2', 4', 5'<br>1', 2', 4', 5' |
| 4'       | 12.3, $\text{CH}_3$                     | 0.91, dd (7.67)                            | 2', 3'                           |
| 5'       | 16.9, $\text{CH}_3$                     | 1.15, d (6.73)                             | 1', 2', 3'                       |
| 2-OH     |                                         | 14.34                                      | 1, 2, 3                          |
| 6-OH     |                                         | 12.79                                      |                                  |

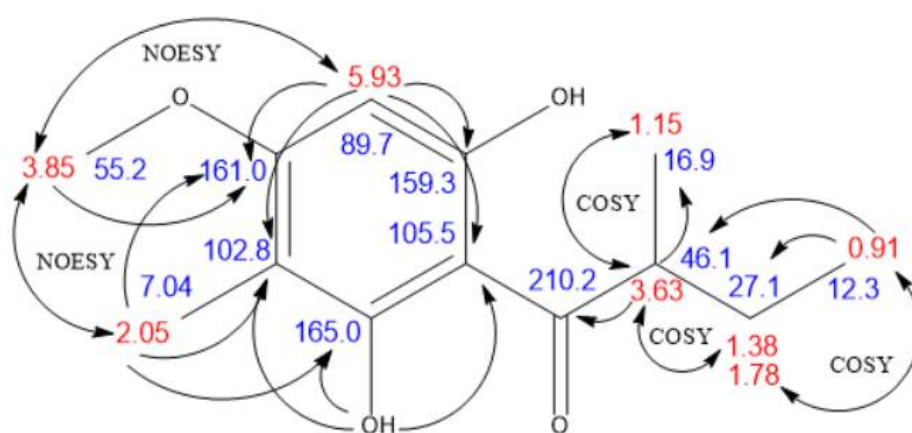

**Figure S3.** HMBC, COSY, and NOESY scheme of pulverulentone B (3).

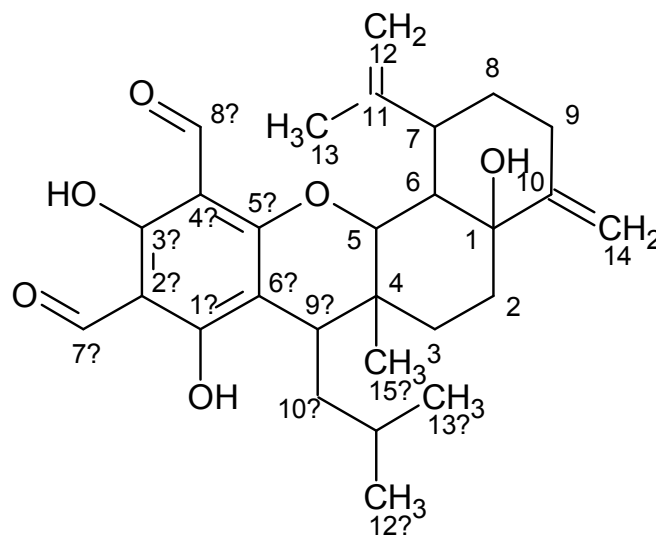

Eucalyptal A

**Table S4.**  $^1\text{H}$  and  $^{13}\text{C}$  chemical shifts ( $\delta$  in ppm) and HMBC correlations of eucalyptal A (4).

| Position | $\delta\text{C}$ (ppm),<br>type of atom | $\delta\text{H}$ (ppm),<br>mult. (J in Hz) | HMBC correlations             |
|----------|-----------------------------------------|--------------------------------------------|-------------------------------|
| 1        | 73.2, C                                 |                                            |                               |
| 2        | 30.3, CH <sub>2</sub>                   | 2.21, m<br>2.46, m                         | 1, 4, 6<br>1, 4, 6            |
| 3        | 29.7, CH <sub>2</sub>                   | 1.40, m<br>1.88, m                         | 1, 4, 5, 15<br>1, 2, 4, 5, 15 |
| 4        | 35.7, C                                 |                                            |                               |
| 5        | 75.4, CH                                | 4.07, d (11.64)                            | 6, 15                         |
| 6        | 44.6, CH                                | 2.60, dd (2.75, 11.59)                     | 2, 5, 7, 8, 10                |
| 7        | 39.5, CH                                | 3.12, br d (11.97)                         | 5, 6, 11                      |
| 8        | 23.4, CH <sub>2</sub>                   | 1.79, m<br>1.96, m                         | 7, 9, 10<br>9, 11             |
| 9        | 32.1, CH <sub>2</sub>                   | 2.41, m<br>2.66, m                         | 1, 7, 8, 14<br>1, 7, 8, 14    |
| 10       | 146.5, C                                |                                            |                               |
| 11       | 149.4, C                                |                                            |                               |
| 12       | 107.8, CH <sub>2</sub>                  | 4.72, s<br>4.84, s                         | 7, 13<br>7, 13                |
| 13       | 22.3, CH <sub>3</sub>                   | 1.87, s                                    | 7, 11, 12                     |
| 14       | 111.1, CH <sub>2</sub>                  | 5.01, s<br>5.11, s                         | 1, 9<br>1, 9                  |
| 15       | 19.6, CH <sub>3</sub>                   | 0.98, s                                    | 3, 4, 5, 9'                   |
| 1'       | 168.5, C                                |                                            |                               |
| 2'       | 104.0, C                                |                                            |                               |
| 3'       | 167.1, C                                |                                            |                               |
| 4'       | 103.9, C                                |                                            |                               |
| 5'       | 162.6, C                                |                                            |                               |
| 6'       | 107.5, C                                |                                            |                               |
| 7'       | 191.2, CHO                              | 10.15, s                                   | 1', 2', 8'                    |
| 8'       | 194.9, CHO                              | 9.89, s                                    | 3', 4', 7'                    |
| 9'       | 37.6, CH                                | 2.49, dd (8.61, 1.80)                      | 5, 5', 6', 10', 11'           |
| 10'      | 42.8, CH <sub>2</sub>                   | 1.09, m                                    | 6', 9'                        |

|       |                       |                |               |
|-------|-----------------------|----------------|---------------|
|       |                       | 1.32, m        | 9'            |
| 11'   | 28.4, CH              | 1.64, m        | -             |
| 12'   | 21.6, CH <sub>3</sub> | 1.02, d (6.42) | 10', 11', 13' |
| 13'   | 22.7, CH <sub>3</sub> | 0.88, d (6.42) | 10', 11', 12' |
| 1'-OH |                       | 13.29, s       | 1', 2', 6'    |
| 3'-OH |                       | 13.75, s       | 2', 3', 4'    |

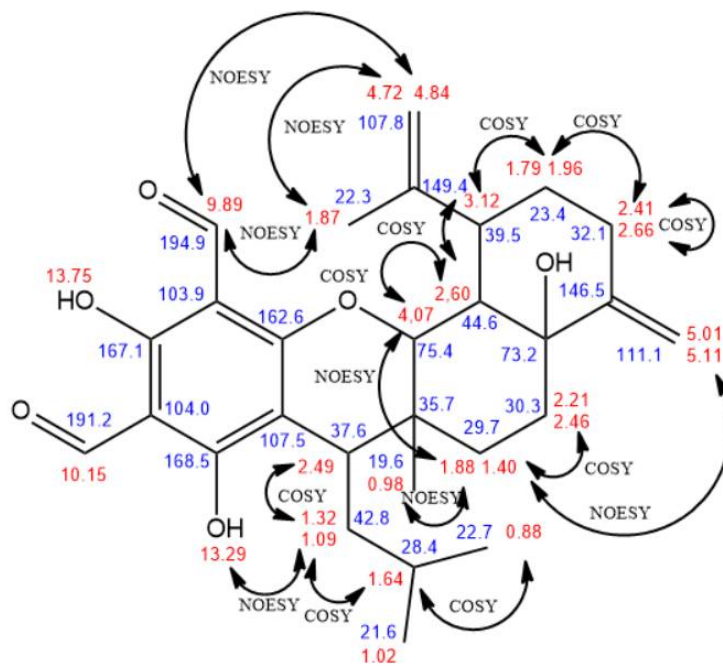

Figure S4. COSY and NOESY scheme of eucalyptal A (4).

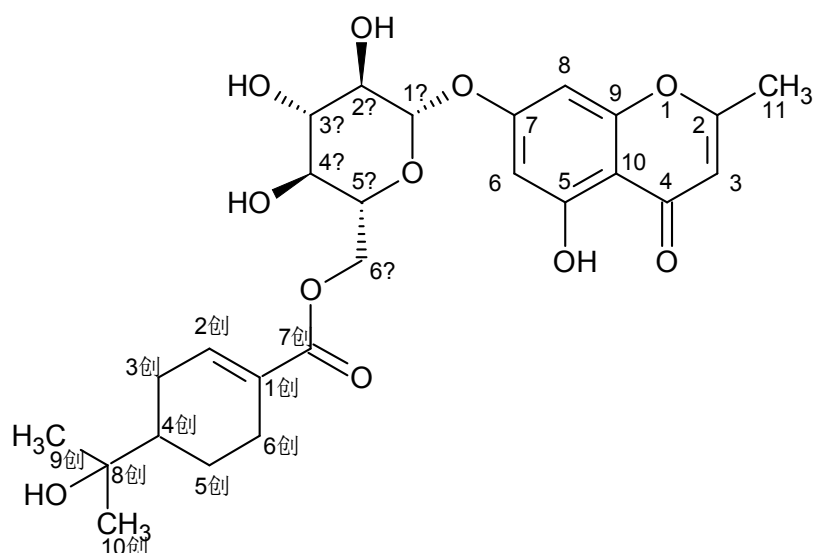

Cypellocarpin C

**Table S5.**  $^1\text{H}$  and  $^{13}\text{C}$  chemical shifts ( $\delta$  in ppm) and HMBC correlations of cypellocarpin C (5).

| Position | $\delta\text{C}$ (ppm),<br>type of atom | $\delta\text{H}$ (ppm),<br>mult. (J in Hz) | HMBC correlations |
|----------|-----------------------------------------|--------------------------------------------|-------------------|
| 2        | 168.5, C                                |                                            |                   |
| 3        | 108.5, CH                               | 6.26, s                                    | 2, 10             |
| 4        | 182.1, C                                |                                            |                   |
| 5        | 162.3, C                                |                                            |                   |
| 6        | 99.3, CH                                | 6.43, d (2.00)                             | 5, 7, 8, 10       |
| 7        | 162.4, C                                |                                            |                   |
| 8        | 94.5, CH                                | 6.63, d (2.00)                             | 6, 7, 9, 10       |
| 9        | 157.7, C                                |                                            |                   |
| 10       | 104.7, C                                |                                            |                   |
| 11       | 20.5, CH <sub>3</sub>                   | 2.39, s                                    | 2, 3              |
| 1'       | 99.3, CH                                | 5.12, dd (3.20, 7.50)                      | 7                 |
| 2'       | 73.3, CH                                | 3.27, m                                    |                   |
| 3'       | 76.4, CH                                | 3.30, m                                    |                   |
| 4'       | 70.4, CH                                | 3.16, m                                    |                   |
| 5'       | 74.1, CH                                | 3.78, m                                    |                   |
| 6'       | 63.9, CH <sub>2</sub>                   | 3.97, dd (7.88, 12.17)<br>4.42, m          |                   |
| 1''      | 134.8, C                                |                                            |                   |
| 2''      | 140.4, CH                               | 6.91, m                                    | 1'', 4'', 7''     |
| 3''      | 27.4, CH <sub>2</sub>                   | 1.92, m<br>2.20, m                         |                   |
| 4''      | 43.8, CH                                | 1.35, m                                    |                   |
| 5''      | 23.2, CH <sub>2</sub>                   | 1.04, m<br>1.86, m                         |                   |
| 6''      | 25.2, CH <sub>2</sub>                   | 2.01, m<br>2.36, m                         |                   |
| 7''      | 165.8, C                                |                                            |                   |
| 8''      | 70.3, C                                 |                                            |                   |
| 9''      | 27.1, CH <sub>3</sub>                   | 1.04, s                                    | 4'', 8'', 10''    |
| 10''     | 27.1, CH <sub>3</sub>                   | 1.04, s                                    | 4'', 8'', 9''     |
| 5-OH     |                                         | 12.84, s                                   | 5, 6, 10          |

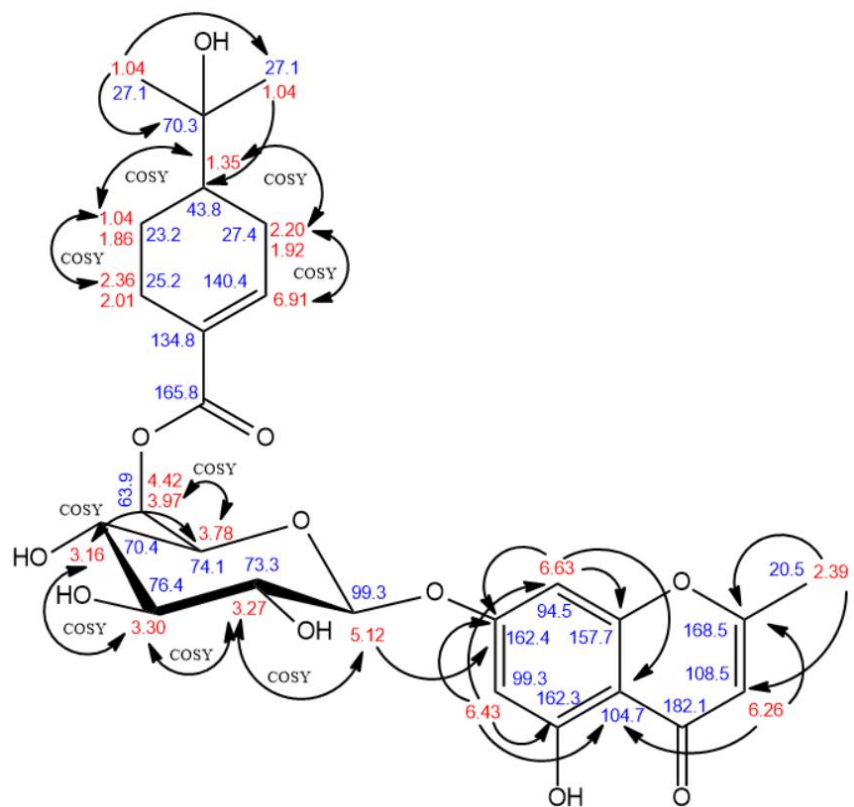

Figure S5. HMBC and COSY scheme of cypellocarpin C (5).

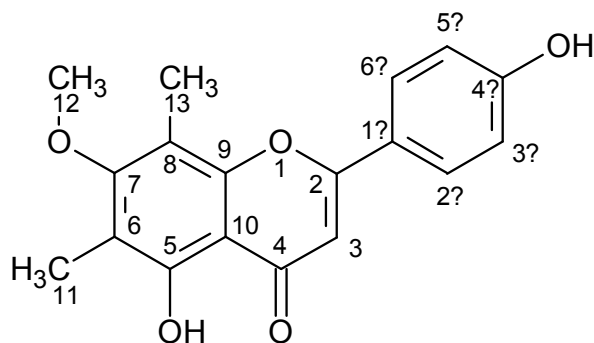

Sideroxylin

**Table S6.**  $^1\text{H}$  and  $^{13}\text{C}$  chemical shifts ( $\delta$  in ppm) and HMBC correlations of sideroxylin (6).

| Position | $\delta\text{C}$ (ppm),<br>type of atom | $\delta\text{H}$ (ppm),<br>mult. (J in Hz) | HMBC<br>correlations |
|----------|-----------------------------------------|--------------------------------------------|----------------------|
| 2        | 164.2, C                                |                                            |                      |
| 3        | 103.1, CH                               | 6.89, s                                    | 1', 2, 4, 10         |
| 4        | 182.9, C                                |                                            |                      |
| 5        | 156.5, C                                |                                            |                      |
| 6        | 113.2, C                                |                                            |                      |
| 7        | 162.4, C                                |                                            |                      |
| 8        | 109.1, C                                |                                            |                      |
| 9        | 152.4, C                                |                                            |                      |
| 10       | 107.3, C                                |                                            |                      |
| 11       | 8.5, CH <sub>3</sub>                    | 2.11, s                                    | 5, 6, 7              |
| 12       | 60.8, OCH <sub>3</sub>                  | 3.76, s                                    | 7                    |
| 13       | 8.6, CH <sub>3</sub>                    | 2.35, s                                    | 7, 8, 9              |
| 1'       | 121.6, C                                |                                            |                      |
| 2'       | 128.9, CH                               | 7.97, d (8.80)                             | 2, 4', 6'            |
| 3'       | 116.4, CH                               | 6.96, d (8.80)                             | 1', 4', 5'           |
| 4'       | 162.2, C                                |                                            |                      |
| 5'       | 116.4, CH                               | 6.96, d (8.80)                             | 1', 3', 4'           |
| 6'       | 128.9, CH                               | 7.97, d (8.80)                             | 2, 2', 4'            |
| 5-OH     |                                         | 13.08, s                                   |                      |
| 4'-OH    |                                         | 10.39, br s                                |                      |

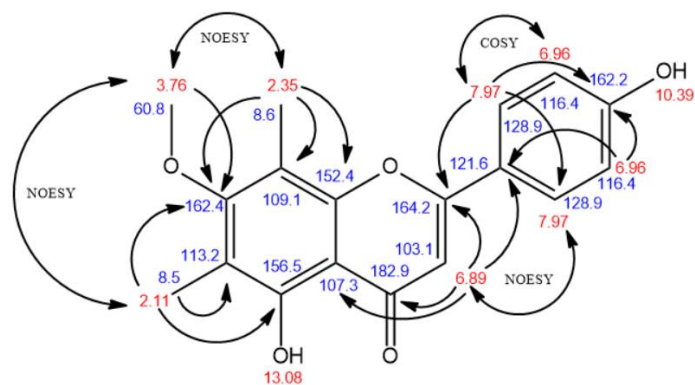

**Figure S6.** HMBC, COSY, and NOESY scheme of sideroxylin (6).



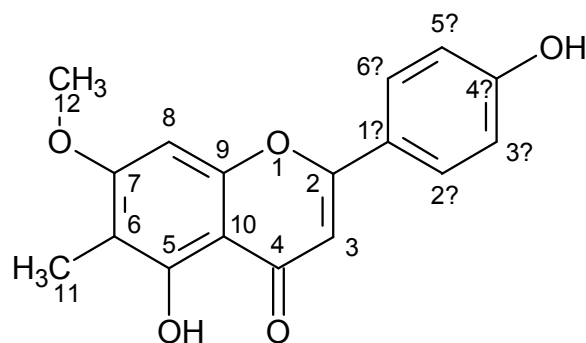

8-Demethylsideroxylin

**Table S7.**  $^1\text{H}$  and  $^{13}\text{C}$  chemical shifts ( $\delta$  in ppm) and HMBC correlations of 8-demethylsideroxylin (7).

| Position | $\delta\text{C}$ (ppm),<br>type of atom | $\delta\text{H}$ (ppm),<br>mult. (J in Hz) | HMBC<br>correlations |
|----------|-----------------------------------------|--------------------------------------------|----------------------|
| 2        | 164.3, C                                |                                            |                      |
| 3        | 103.1, CH                               | 6.85, s                                    | 1', 2, 4, 10         |
| 4        | 182.5, C                                |                                            |                      |
| 5        | 158.7, C                                |                                            |                      |
| 6        | 107.8, C                                |                                            |                      |
| 7        | 163.3, C                                |                                            |                      |
| 8        | 89.2, CH                                | 6.87, s                                    | 6, 7, 9, 10          |
| 9        | 155.6, C                                |                                            |                      |
| 10       | 104.4, C                                |                                            |                      |
| 11       | 7.9, CH <sub>3</sub>                    | 2.01, s                                    | 5, 6, 7              |
| 12       | 56.7, OCH <sub>3</sub>                  | 3.93, s                                    | 7                    |
| 1'       | 121.1, C                                |                                            |                      |
| 2'       | 128.8, CH                               | 7.97, d (8.78)                             | 2, 4', 6'            |
| 3'       | 115.6, CH                               | 6.94, d (8.78)                             | 1, 4', 5'            |
| 4'       | 161.1, C                                |                                            |                      |
| 5'       | 115.6, CH                               | 6.94, d (8.78)                             | 1', 3', 4'           |
| 6'       | 128.8, CH                               | 7.97, d (8.78)                             | 2, 2', 4'            |
| 5-OH     |                                         | 13.11, s                                   |                      |
| 4'-OH    |                                         | 10.35, br s                                |                      |

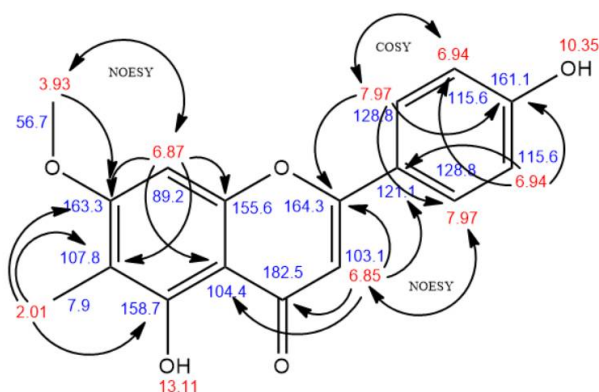

**Figure S7.** HMBC, COSY, and NOESY scheme of 8-demethylsideroxylin (7).

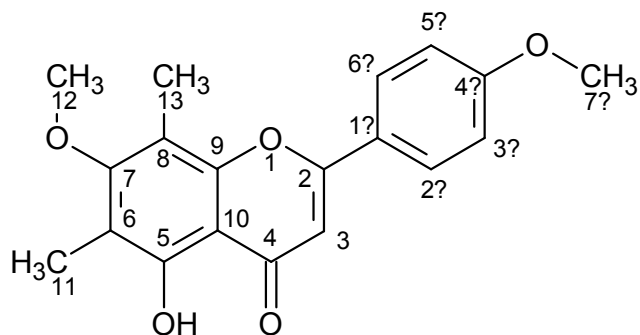

Eucalyptin

**Table S8.**  $^1\text{H}$  and  $^{13}\text{C}$  chemical shifts ( $\delta$  in ppm) and HMBC correlations of eucalyptin (8).

| Position | $\delta\text{C}$ (ppm),<br>type of atom | $\delta\text{H}$ (ppm),<br>mult. (J in Hz) | HMBC<br>correlations |
|----------|-----------------------------------------|--------------------------------------------|----------------------|
| 2        | 163.9, C                                |                                            |                      |
| 3        | 103.7, CH                               | 6.64, s                                    | 1', 2, 4, 10         |
| 4        | 183.0, C                                |                                            |                      |
| 5        | 156.9, C                                |                                            |                      |
| 6        | 114.0, C                                |                                            |                      |
| 7        | 162.4, C                                |                                            |                      |
| 8        | 108.4, C                                |                                            |                      |
| 9        | 152.5, C                                |                                            |                      |
| 10       | 107.1, C                                |                                            |                      |
| 11       | 8.1, CH <sub>3</sub>                    | 2.21, s                                    | 5, 6, 7              |
| 12       | 61.2, OCH <sub>3</sub>                  | 3.81, s                                    | 7                    |
| 13       | 9.3, CH <sub>3</sub>                    | 2.41, s                                    | 7, 8, 9              |
| 1'       | 123.6, C                                |                                            |                      |
| 2'       | 127.7, CH                               | 7.89, d (8.74)                             | 4', 6'               |
| 3'       | 114.0, CH                               | 7.05, d (8.74)                             | 1', 4', 5'           |
| 4'       | 162.7, C                                |                                            |                      |
| 5'       | 114.0, CH                               | 7.05, d (8.74)                             | 1', 3', 4'           |
| 6'       | 127.7, CH                               | 7.89, d (8.74)                             | 2', 4                |
| 7'       | 55.6, OCH <sub>3</sub>                  | 3.91, s                                    | 4'                   |
| 5-OH     |                                         | 12.88, br s                                |                      |

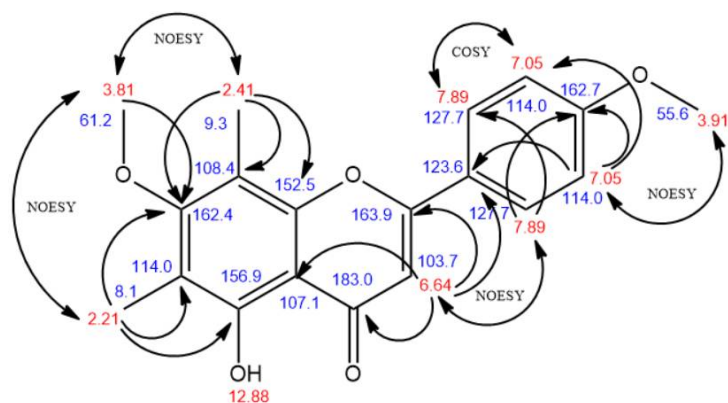

**Figure S8.** HMBC, COSY, and NOESY scheme of eucalyptin (8).



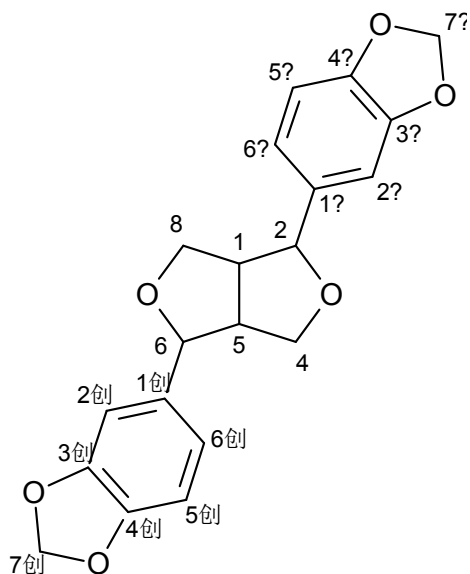

Sesamin

**Table S10.**  $^1\text{H}$  and  $^{13}\text{C}$  chemical shifts ( $\delta$  in ppm) and HMBC correlations of sesamin (10).

| Position | $\delta\text{C}$ (ppm),<br>type of atom | $\delta\text{H}$ (ppm),<br>mult. (J in Hz) | HMBC<br>correlations |
|----------|-----------------------------------------|--------------------------------------------|----------------------|
| 1        | 54.2, CH                                | 3.06, m                                    |                      |
| 2        | 85.6, CH                                | 4.73, d (4.39)                             | 1, 8, 1', 2', 6'     |
| 4        | 71.5, CH <sub>2</sub>                   | 3.89, m                                    | 6                    |
|          |                                         | 4.24, m                                    | 5, 6                 |
| 5        | 54.2, CH                                | 3.06, m                                    |                      |
| 6        | 85.6, CH                                | 4.73, d (4.39)                             | 4, 5, 1'', 2'', 6''  |
| 8        | 71.5, CH <sub>2</sub>                   | 3.89, m                                    | 2                    |
|          |                                         | 4.24, m                                    | 1, 2                 |
| 1'       | 134.2, C                                |                                            |                      |
| 2'       | 106.0, CH                               | 6.86, d (1.23)                             | 2, 4', 6'            |
| 3'       | 147.6, C                                |                                            |                      |
| 4'       | 146.3, C                                |                                            |                      |
| 5'       | 107.9, CH                               | 6.78, obscured                             | 1', 3'               |
| 6'       | 119.1, CH                               | 6.80, obscured                             | 1', 2', 4'           |
| 7'       | 100.6, CH <sub>2</sub>                  | 5.96, 2H, s                                | 3', 4'               |
| 1''      | 134.2, C                                |                                            |                      |
| 2''      | 106.0, CH                               | 6.86, d (1.23)                             | 6, 4'', 6''          |
| 3''      | 147.6, C                                |                                            |                      |
| 4''      | 146.3, C                                |                                            |                      |
| 5''      | 107.9, CH                               | 6.78, obscured                             | 1'', 3''             |
| 6''      | 119.1, CH                               | 6.80, obscured                             | 1'', 2'', 4''        |
| 7''      | 100.6, CH <sub>2</sub>                  | 5.96, 2H, s                                | 3'', 4''             |

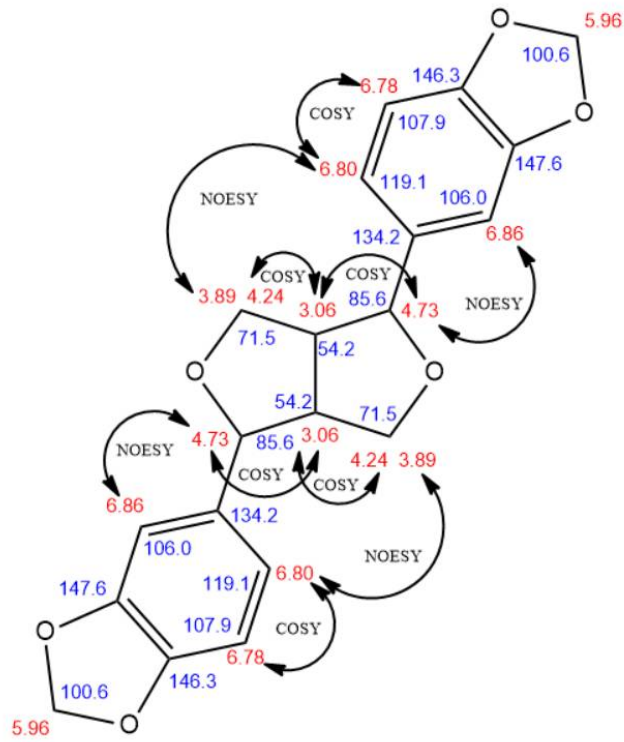

**Figure S10.** COSY and NOESY scheme of sesamin (10).

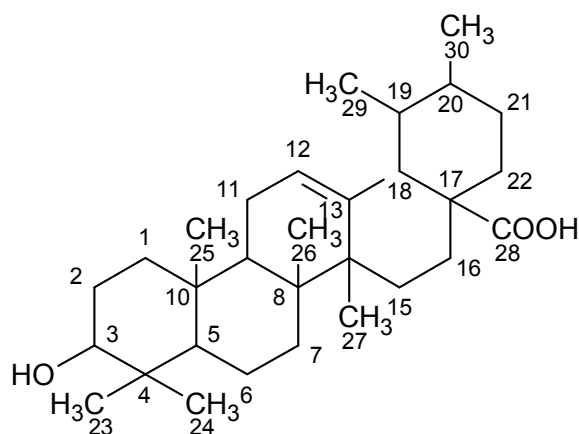

Ursolic acid

**Table S11.**  $^1\text{H}$  and  $^{13}\text{C}$  chemical shifts ( $\delta$  in ppm) and HMBC correlations of ursolic acid (11).

| Position | $\delta\text{C}$ (ppm),<br>type of atom | $\delta\text{H}$ (ppm),<br>mult. (J in Hz) | HMBC<br>correlations          |
|----------|-----------------------------------------|--------------------------------------------|-------------------------------|
| 1        | 36.4, CH <sub>2</sub>                   | 1.29, m<br>1.54, m                         | 2, 3, 5, 10                   |
| 2        | 27.4, CH <sub>2</sub>                   | 1.28, m<br>1.45, m                         |                               |
| 3        | 77.2, CH                                | 3.00, m                                    | 4, 23, 24                     |
| 4        | 38.8, C                                 |                                            |                               |
| 5        | 55.2, CH                                | 0.68, m                                    |                               |
| 6        | 18.5, CH <sub>2</sub>                   | 1.30, m<br>1.40, m                         |                               |
| 7        | 32.9, CH <sub>2</sub>                   | 1.23, m<br>1.38, m                         |                               |
| 8        | 39.7, C                                 |                                            |                               |
| 9        | 47.5, CH                                | 1.45, m                                    | 1, 8, 9, 11, 14               |
| 10       | 36.4, C                                 |                                            |                               |
| 11       | 23.4, CH <sub>2</sub>                   | 1.84, 2H, m                                |                               |
| 12       | 124.7, CH                               | 5.13, t (3.02)                             | 9, 11, 14, 18                 |
| 13       | 138.6, C                                |                                            |                               |
| 14       | 42.1, C                                 |                                            |                               |
| 15       | 28.4, CH <sub>2</sub>                   | 0.74, m<br>1.79, m                         |                               |
| 16       | 23.8, CH <sub>2</sub>                   | 1.50, m<br>1.92, m                         |                               |
| 17       | 47.6, C                                 |                                            |                               |
| 18       | 52.7, CH                                | 2.11, d (11.53)                            | 12, 13, 14, 17, 20,<br>28, 29 |
| 19       | 38.8, CH                                | 1.30, m                                    |                               |
| 20       | 39.0, CH                                | 0.92, m                                    | 21                            |
| 21       | 30.5, CH <sub>2</sub>                   | 1.26, m<br>1.45, m                         |                               |
| 22       | 39.9, CH <sub>2</sub>                   | 1.90, m<br>2.10, m                         |                               |
| 23       | 16.4, CH <sub>3</sub>                   | 0.68, s                                    | 3, 4, 5, 24                   |
| 24       | 28.6, CH <sub>3</sub>                   | 0.89, s                                    | 3, 4, 5, 23                   |
| 25       | 21.5, CH <sub>3</sub>                   | 0.87, s                                    | 1, 9                          |
| 26       | 16.7, CH <sub>3</sub>                   | 0.75, s                                    | 7, 8, 9, 14                   |

|    |                       |                |           |
|----|-----------------------|----------------|-----------|
| 27 | 23.6, CH <sub>3</sub> | 1.04, s        | 8, 14, 15 |
| 28 | 178.8, C              |                |           |
| 29 | 17.0, C               | 0.81, obscured | 18, 19    |
| 30 | 28.2, C               | 0.92, obscured | 19, 21    |

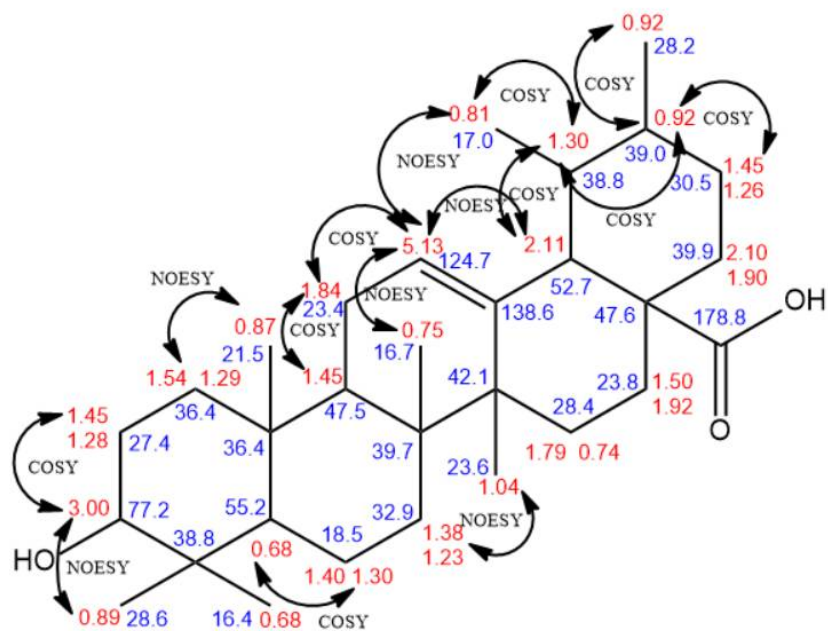

Figure S11. COSY and NOESY scheme of ursolic acid (11).

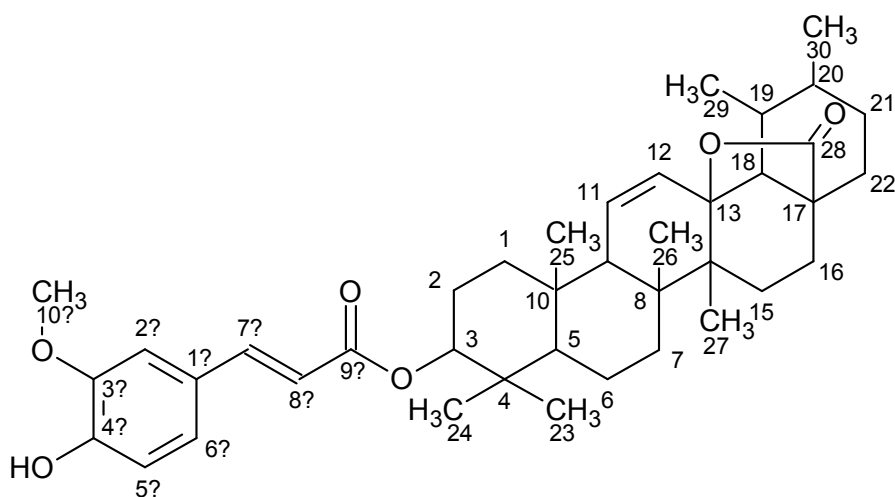

Tereticornate A

**Table S12.**  $^1\text{H}$  and  $^{13}\text{C}$  chemical shifts ( $\delta$  in ppm) and HMBC correlations of tereticornate A (12).

| Position | $\delta\text{C}$ (ppm),<br>type of atom | $\delta\text{H}$ (ppm),<br>mult. (J in Hz) | HMBC<br>correlations |
|----------|-----------------------------------------|--------------------------------------------|----------------------|
| 1        | 31.0, CH <sub>2</sub>                   | 1.13, m<br>1.82, m                         |                      |
| 2        | 25.5, CH <sub>2</sub>                   | 1.24, m<br>1.74, m                         |                      |
| 3        | 80.3, CH                                | 4.66, dd (5.79, 10.50)                     | 9'                   |
| 4        | 37.6, C                                 |                                            |                      |
| 5        | 54.7, CH                                | 0.90, m                                    | 10                   |
| 6        | 17.5, CH <sub>2</sub>                   | 1.64, 2H, m                                |                      |
| 7        | 30.5, CH <sub>2</sub>                   | 1.61, m<br>1.80, m                         |                      |
| 8        | 41.5, C                                 |                                            |                      |
| 9        | 52.9, CH                                | 2.01, s                                    | 10, 12, 14           |
| 10       | 36.9, C                                 |                                            |                      |
| 11       | 128.8, CH                               | 5.55, dd (2.25, 10.30)                     | 8, 9                 |
| 12       | 133.0, CH                               | 5.96, d (10.30)                            | 13, 14               |
| 13       | 89.5, C                                 |                                            |                      |
| 14       | 41.5, C                                 |                                            |                      |
| 15       | 25.1, CH <sub>2</sub>                   | 1.23, m<br>1.74, m                         |                      |
| 16       | 22.9, CH <sub>2</sub>                   | 1.44, m<br>2.16, m                         | 28                   |
| 17       | 45.0, C                                 |                                            |                      |
| 18       | 60.4, CH                                | 1.65, m                                    | 13, 16, 17, 19       |
| 19       | 40.2, CH                                | 0.92, m                                    |                      |
| 20       | 38.1, CH                                | 1.81, m                                    |                      |
| 21       | 30.4, CH <sub>2</sub>                   | 1.27, m<br>1.72, m                         |                      |
| 22       | 31.3, CH <sub>2</sub>                   | 1.23, m<br>1.57, m                         |                      |
| 23       | 27.6, CH <sub>3</sub>                   | 0.92, s                                    | 3, 4, 5, 24          |
| 24       | 16.3, CH <sub>3</sub>                   | 0.96, s                                    | 3, 4, 5, 23          |
| 25       | 17.8, CH <sub>3</sub>                   | 0.98, s                                    | 1, 9, 10             |





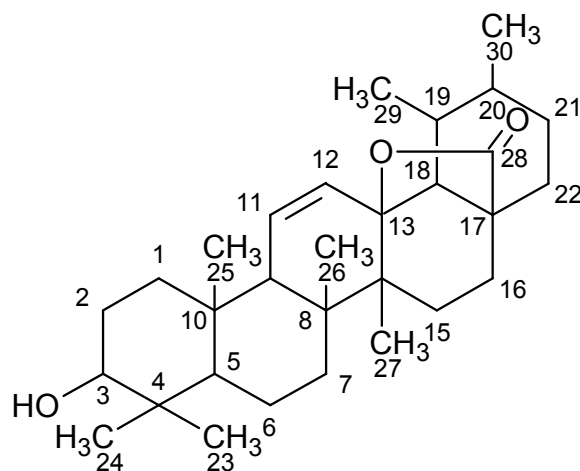

Ursolic acid lactone

**Table S13.**  $^1\text{H}$  and  $^{13}\text{C}$  chemical shifts ( $\delta$  in ppm) and HMBC correlations of ursolic acid lactone (13a).

| Position | $\delta\text{C}$ (ppm),<br>type of atom | $\delta\text{H}$ (ppm),<br>mult. (J in Hz) | HMBC<br>correlations |
|----------|-----------------------------------------|--------------------------------------------|----------------------|
| 1        | 37.3, CH <sub>2</sub>                   | 1.36, m<br>2.03, m                         |                      |
| 2        | 27.0, CH <sub>2</sub>                   | 1.63, m<br>1.69, m                         |                      |
| 3        | 78.6, CH                                | 3.23, m                                    |                      |
| 4        | 38.5, C                                 |                                            |                      |
| 5        | 54.3, CH                                | 0.75, m                                    |                      |
| 6        | 17.6, CH <sub>2</sub>                   | 1.48, m<br>1.59, m                         |                      |
| 7        | 30.9, CH <sub>2</sub>                   | 1.63, m<br>1.82, m                         |                      |
| 8        | 41.3, C                                 |                                            |                      |
| 9        | 52.4, CH                                | 1.96, m                                    |                      |
| 10       | 36.2, C                                 |                                            |                      |
| 11       | 133.3, CH                               | 5.98, m                                    | 8, 10, 13            |
| 12       | 128.6, CH                               | 5.54, m                                    |                      |
| 13       | 89.7, C                                 |                                            |                      |
| 14       | 41.6, C                                 |                                            |                      |
| 15       | 25.0, CH <sub>2</sub>                   | 1.68, m<br>1.79, m                         |                      |
| 16       | 22.4, CH <sub>2</sub>                   | 1.40, m<br>2.15, m                         | 15, 17, 28           |
| 17       | 43.7, C                                 |                                            |                      |
| 18       | 60.2, CH                                | 1.64, m                                    | 12, 13, 17, 19, 29   |
| 19       | 38.3, CH                                | 1.32, m                                    | 17, 18               |
| 20       | 38.5, CH                                | 1.78, m                                    |                      |
| 21       | 30.4, CH <sub>2</sub>                   | 1.29, m<br>1.54, m                         |                      |
| 22       | 36.9, CH <sub>2</sub>                   | 1.34, m<br>1.80, m                         |                      |
| 23       | 14.7, CH <sub>3</sub>                   | 0.78, s                                    | 3, 4, 5, 24          |
| 24       | 27.2, CH <sub>3</sub>                   | 0.99, s                                    | 3, 4, 5, 23          |

|    |                       |                |            |
|----|-----------------------|----------------|------------|
| 25 | 16.8, CH <sub>3</sub> | 0.90, s        | 5, 9, 10   |
| 26 | 19.0, CH <sub>3</sub> | 1.06, s        | 7, 9, 14   |
| 27 | 15.9, CH <sub>3</sub> | 1.16, s        | 8, 13, 15  |
| 28 | 179.7, C              |                |            |
| 29 | 17.8, CH <sub>3</sub> | 1.00, obscured | 18, 19, 20 |
| 30 | 18.4, CH <sub>3</sub> | 0.93, obscured |            |

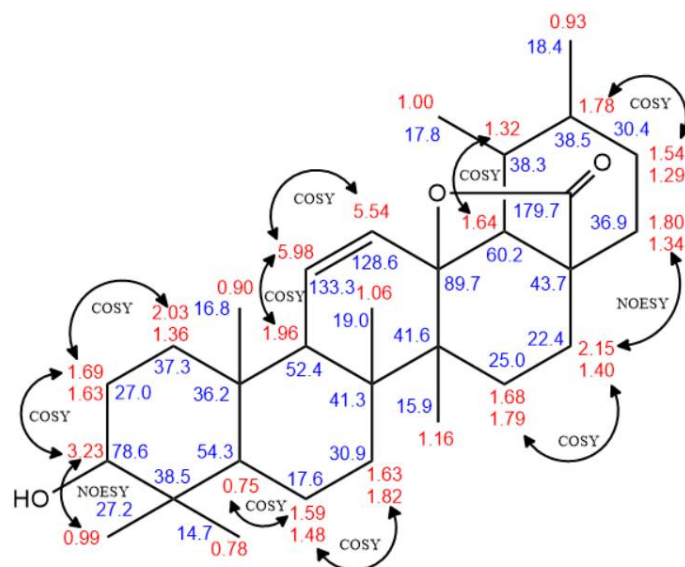

**Figure S13.** COSY and NOESY scheme of ursolic acid lactone (**13a**).

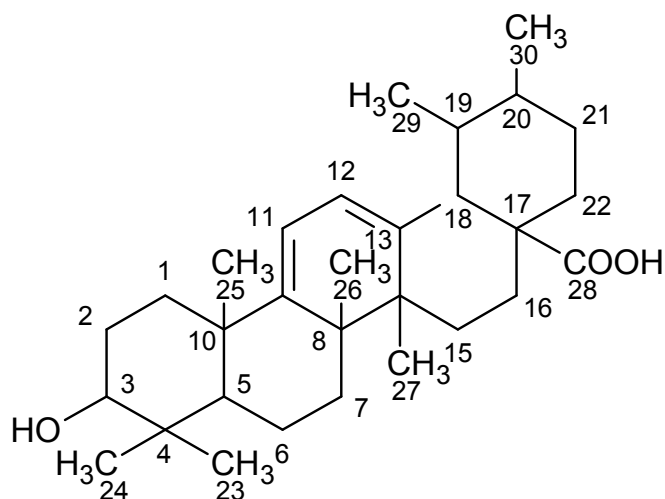

3 $\beta$ -hydroxyursa-9(11),12-dien-28-oic acid (loxanic acid)

**Table S14.**  $^1\text{H}$  and  $^{13}\text{C}$  chemical shifts ( $\delta$  in ppm) and HMBC correlations of loxanic acid (**13b**).

| Position | $\delta\text{C}$ (ppm),<br>type of atom | $\delta\text{H}$ (ppm),<br>mult. (J in Hz) | HMBC<br>correlations      |
|----------|-----------------------------------------|--------------------------------------------|---------------------------|
| 1        | 36.4, CH <sub>2</sub>                   | obscured                                   |                           |
| 2        | 27.0, CH <sub>2</sub>                   | 1.63, m<br>1.69, m                         |                           |
| 3        | 78.6, CH                                | 3.23, m                                    |                           |
| 4        | 38.5, C                                 |                                            |                           |
| 5        | 50.9, CH                                | 0.84, m                                    |                           |
| 6        | 17.6, CH <sub>2</sub>                   | 1.48, m<br>1.59, m                         |                           |
| 7        | 32.1, CH <sub>2</sub>                   | 1.63, m<br>1.82, m                         |                           |
| 8        | 42.9, C                                 |                                            |                           |
| 9        | 154.7, C                                |                                            |                           |
| 10       | 38.6, C                                 |                                            |                           |
| 11       | 115.1, CH                               | 5.59, obscured                             | 8, 9, 10, 13              |
| 12       | 123.1, CH                               | 5.52, d (2.63)                             | 9, 11, 14, 18             |
| 13       | 138.6, C                                |                                            |                           |
| 14       | 40.6, C                                 |                                            |                           |
| 15       | 26.9, CH <sub>2</sub>                   | 1.69, m<br>2.03, m                         |                           |
| 16       | 24.6, CH <sub>2</sub>                   | 1.69, m<br>1.74, m                         |                           |
| 17       | 47.2, C                                 |                                            |                           |
| 18       | 50.7, CH                                | 2.32, m                                    | 12, 13, 14, 16, 17,<br>19 |
| 19       | 38.5, CH                                | 1.32, m                                    |                           |
| 20       | 38.5, CH                                | 1.78, m                                    |                           |
| 21       | 30.4, CH <sub>2</sub>                   | 1.29, m<br>1.54, m                         |                           |
| 22       | 36.9, CH <sub>2</sub>                   | 1.36, m<br>2.03, m                         | 28<br>28                  |
| 23       | 15.1, CH <sub>3</sub>                   | 0.79, s                                    | 3, 4, 5, 24               |
| 24       | 27.2, CH <sub>3</sub>                   | 1.02, s                                    | 3, 4, 5, 23               |
